# Supplementary material for: Is It the Same Every Summer for the Euphausiids of the Ross Sea?
Source: MDPI journal article supplement (doi:10.3390/d14060433), 2022-05-28
Supplement: s1 [file s1]

## Supplementary material

### Is it the same every summer for the euphausiids of the Ross Sea?

Andrea De Felice, Ilaria Biagiotti, Giovanni Canduci, Ilaria Costantini, Sara Malavolti, Giordano Giuliani, Iole Leonori

**Table S1.** Levene Test of Homogeneity of Variance (center = mean) for all case studies of *E. crystallorophias*.

| Depth   |       | Df  | F value | Pr (>F)   | Signif. |
|---------|-------|-----|---------|-----------|---------|
| 0-200 m | group | 95  | 1.8134  | 0.0002505 | ***     |
|         |       | 197 |         |           |         |
| 0.5 m   | group | 86  | 1.0893  | 0.3272    |         |
|         |       | 129 |         |           |         |
| 97 m    | group | 86  | 1.669   | 0.004232  | **      |
|         |       | 129 |         |           |         |
| 199 m   | group | 86  | 1.7547  | 0.001986  | **      |
|         |       | 126 |         |           |         |

Signif. codes: '\*\*\*'  $p < 0.001$  '\*\*'  $p < 0.01$  '\*'  $p < 0.05$

**Table S2.** Levene Test of Homogeneity of Variance (center = mean) for all case studies of *E. superba*.

| Depth   |       | Df  | F value | Pr (>F) | Signif. |
|---------|-------|-----|---------|---------|---------|
| 0-200 m | group | 164 | 1.2669  | 0.08066 |         |
|         |       | 128 |         |         |         |
| 0.5 m   | group | 122 | 0.8274  | 0.8373  |         |
|         |       | 93  |         |         |         |
| 97 m    | group | 122 | 1.0676  | 0.3723  |         |
|         |       | 93  |         |         |         |
| 199 m   | group | 120 | 1.0346  | 0.4347  |         |
|         |       | 92  |         |         |         |

Signif. codes: '\*\*\*'  $p < 0.001$  '\*\*'  $p < 0.01$  '\*'  $p < 0.05$

**Table S3.** Tukey multiple comparisons of means 95% family-wise confidence level, for *E. crystallorophias* and averaged environmental parameters.

| Term | Contrast  | Null.Value | Estimate  | Conf.Low   | Conf.High | Adj.P.Value |
|------|-----------|------------|-----------|------------|-----------|-------------|
| Year | 2000-1994 | 0          | 0.0893365 | -0.1500187 | 0.3286916 | 0.8925488   |
| Year | 2016-1994 | 0          | 0.1380727 | -0.2062926 | 0.4824380 | 0.8596199   |
| Year | 2004-1994 | 0          | 0.1638691 | -0.0743106 | 0.4020488 | 0.3598073   |
| Year | 1997-1994 | 0          | 0.3483177 | 0.0807957  | 0.6158398 | 0.0030706   |
| Year | 2014-1994 | 0          | 0.4663240 | 0.1510619  | 0.7815861 | 0.0004244   |
| Year | 2016-2000 | 0          | 0.0487362 | -0.2754240 | 0.3728965 | 0.9980901   |
| Year | 2004-2000 | 0          | 0.0745326 | -0.1333663 | 0.2824315 | 0.9080034   |
| Year | 1997-2000 | 0          | 0.2589812 | 0.0180239  | 0.4999386 | 0.0269810   |
| Year | 2014-2000 | 0          | 0.3769875 | 0.0839302  | 0.6700448 | 0.0036142   |
| Year | 2004-2016 | 0          | 0.0257964 | -0.2974969 | 0.3490897 | 0.9999133   |
| Year | 1997-2016 | 0          | 0.2102450 | -0.1352358 | 0.5557259 | 0.5024398   |
| Year | 2014-2016 | 0          | 0.3282513 | -0.0553881 | 0.7118907 | 0.1413167   |
| Year | 1997-2004 | 0          | 0.1844486 | -0.0553411 | 0.4242384 | 0.2376743   |
| Year | 2014-2004 | 0          | 0.3024549 | 0.0103569  | 0.5945529 | 0.0375638   |
| Year | 2014-1997 | 0          | 0.1180063 | -0.1984740 | 0.4344865 | 0.8929515   |

**Table S4.** Tukey multiple comparisons of means 95% family-wise confidence level, for *E. crystallorophias* and environmental parameters at 0.5 m.

| Term | Contrast  | Null.Value | Estimate  | Conf.Low   | Conf.High | Adj.P.Value |
|------|-----------|------------|-----------|------------|-----------|-------------|
| Year | 2016-2000 | 0          | 0.0449494 | -0.2634470 | 0.3533458 | 0.9945114   |
| Year | 2004-2000 | 0          | 0.0707458 | -0.1274347 | 0.2689263 | 0.8629699   |
| Year | 1994-2000 | 0          | 0.0810069 | -0.2481719 | 0.4101858 | 0.9611527   |
| Year | 2014-2000 | 0          | 0.3732007 | 0.0943084  | 0.6520930 | 0.0027036   |
| Year | 2004-2016 | 0          | 0.0257964 | -0.2813489 | 0.3329417 | 0.9993634   |
| Year | 1994-2016 | 0          | 0.0360575 | -0.3681967 | 0.4403117 | 0.9991928   |
| Year | 2014-2016 | 0          | 0.3282513 | -0.0362259 | 0.6927285 | 0.0995299   |
| Year | 1994-2004 | 0          | 0.0102611 | -0.3177459 | 0.3382682 | 0.9999875   |
| Year | 2014-2004 | 0          | 0.3024549 | 0.0249467  | 0.5799631 | 0.0250281   |
| Year | 2014-1994 | 0          | 0.2921938 | -0.0900287 | 0.6744162 | 0.2223580   |

**Table S5.** Tukey multiple comparisons of means 95% family-wise confidence level, for *E. crystallorophias* and environmental parameters at 97 m.

| Term | Contrast  | Null.Value | Estimate  | Conf.Low   | Conf.High | Adj.P.Value |
|------|-----------|------------|-----------|------------|-----------|-------------|
| Year | 2016-2000 | 0          | 0.0449494 | -0.2543432 | 0.3442420 | 0.9938413   |
| Year | 2004-2000 | 0          | 0.0707458 | -0.1215844 | 0.2630760 | 0.8495053   |
| Year | 1994-2000 | 0          | 0.0810069 | -0.2384546 | 0.4004685 | 0.9567704   |
| Year | 2014-2000 | 0          | 0.3732007 | 0.1025413  | 0.6438601 | 0.0018018   |
| Year | 2004-2016 | 0          | 0.0257964 | -0.2722820 | 0.3238748 | 0.9992834   |
| Year | 1994-2016 | 0          | 0.0360575 | -0.3562631 | 0.4283782 | 0.9990916   |
| Year | 2014-2016 | 0          | 0.3282513 | -0.0254666 | 0.6819692 | 0.0830138   |
| Year | 1994-2004 | 0          | 0.0102611 | -0.3080632 | 0.3285854 | 0.9999859   |
| Year | 2014-2004 | 0          | 0.3024549 | 0.0331387  | 0.5717711 | 0.0190845   |
| Year | 2014-1994 | 0          | 0.2921938 | -0.0787455 | 0.6631331 | 0.1961439   |

**Table S6.** Tukey multiple comparisons of means 95% family-wise confidence level, for *E. crystallorophias* and environmental parameters at 199 m.

| Term | Contrast  | Null.Value | Estimate  | Conf.Low   | Conf.High | Adj.P.Value |
|------|-----------|------------|-----------|------------|-----------|-------------|
| Year | 2016-2000 | 0          | 0.0388190 | -0.2529393 | 0.3305772 | 0.9961369   |
| Year | 2004-2000 | 0          | 0.0692718 | -0.1195695 | 0.2581131 | 0.8506965   |
| Year | 1994-2000 | 0          | 0.0798680 | -0.2314423 | 0.3911783 | 0.9549062   |
| Year | 2014-2000 | 0          | 0.3670703 | 0.1030559  | 0.6310847 | 0.0016077   |
| Year | 2004-2016 | 0          | 0.0304528 | -0.2596712 | 0.3205768 | 0.9984675   |
| Year | 1994-2016 | 0          | 0.0410490 | -0.3402972 | 0.4223953 | 0.9983085   |
| Year | 2014-2016 | 0          | 0.3282513 | -0.0155720 | 0.6720746 | 0.0691214   |
| Year | 1994-2004 | 0          | 0.0105963 | -0.2991829 | 0.3203754 | 0.9999821   |
| Year | 2014-2004 | 0          | 0.2977985 | 0.0355913  | 0.5600058 | 0.0171748   |
| Year | 2014-1994 | 0          | 0.2872023 | -0.0733608 | 0.6477653 | 0.1867183   |

**Table S7.** Tukey multiple comparisons of means 95% family-wise confidence level, for *E. superba* and averaged environmental parameters.

| Term | Contrast  | Null.Value | Estimate  | Conf.Low   | Conf.High | Adj.P.Value |
|------|-----------|------------|-----------|------------|-----------|-------------|
| Year | 1997-2004 | 0          | 0.0247614 | -0.3159717 | 0.3654946 | 0.9999454   |
| Year | 2016-2004 | 0          | 0.0559694 | -0.4034194 | 0.5153583 | 0.9993084   |
| Year | 2000-2004 | 0          | 0.3256875 | 0.0302701  | 0.6211048 | 0.0212008   |
| Year | 1994-2004 | 0          | 0.4367032 | 0.0982579  | 0.7751486 | 0.0034689   |
| Year | 2014-2004 | 0          | 0.7968376 | 0.3817761  | 1.2118991 | 0.0000012   |
| Year | 2016-1997 | 0          | 0.0312080 | -0.4597087 | 0.5221247 | 0.9999719   |
| Year | 2000-1997 | 0          | 0.3009261 | -0.0414662 | 0.6433183 | 0.1212290   |
| Year | 1994-1997 | 0          | 0.4119418 | 0.0318020  | 0.7920816 | 0.0249945   |
| Year | 2014-1997 | 0          | 0.7720762 | 0.3223684  | 1.2217840 | 0.0000210   |
| Year | 2000-2016 | 0          | 0.2697180 | -0.1909028 | 0.7303389 | 0.5460663   |
| Year | 1994-2016 | 0          | 0.3807338 | -0.1085977 | 0.8700653 | 0.2261789   |
| Year | 2014-2016 | 0          | 0.7408682 | 0.1957295  | 1.2860068 | 0.0016657   |
| Year | 1994-2000 | 0          | 0.1110158 | -0.2290998 | 0.4511314 | 0.9367153   |
| Year | 2014-2000 | 0          | 0.4711501 | 0.0547256  | 0.8875747 | 0.0163548   |
| Year | 2014-1994 | 0          | 0.3601344 | -0.0878425 | 0.8081112 | 0.1947490   |

**Table S8.** Tukey multiple comparisons of means 95% family-wise confidence level, for *E. superba* and environmental parameters at 0.5 m.

| Term | Contrast  | Null.Value | Estimate  | Conf.Low   | Conf.High | Adj.P.Value |
|------|-----------|------------|-----------|------------|-----------|-------------|
| Year | 2016-2004 | 0          | 0.0559694 | -0.4093070 | 0.5212458 | 0.9973922   |
| Year | 1994-2004 | 0          | 0.2266373 | -0.2702414 | 0.7235159 | 0.7188562   |
| Year | 2000-2004 | 0          | 0.3101819 | 0.0099699  | 0.6103940 | 0.0390091   |
| Year | 2014-2004 | 0          | 0.7968376 | 0.3764567  | 1.2172185 | 0.0000044   |
| Year | 1994-2016 | 0          | 0.1706678 | -0.4417132 | 0.7830488 | 0.9397847   |
| Year | 2000-2016 | 0          | 0.2542125 | -0.2129591 | 0.7213841 | 0.5653163   |
| Year | 2014-2016 | 0          | 0.7408682 | 0.1887430  | 1.2929933 | 0.0026044   |
| Year | 2000-1994 | 0          | 0.0835447 | -0.4151091 | 0.5821985 | 0.9906505   |
| Year | 2014-1994 | 0          | 0.5702004 | -0.0088060 | 1.1492068 | 0.0558526   |
| Year | 2014-2000 | 0          | 0.4866557 | 0.0641781  | 0.9091333 | 0.0149657   |

**Table S9.** Tukey multiple comparisons of means 95% family-wise confidence level, for *E. superba* and environmental parameters at 97 m.

| Term | Contrast  | Null.Value | Estimate  | Conf.Low   | Conf.High | Adj.P.Value |
|------|-----------|------------|-----------|------------|-----------|-------------|
| Year | 2016-2004 | 0          | 0.0559694 | -0.3758699 | 0.4878088 | 0.9965142   |
| Year | 1994-2004 | 0          | 0.2266373 | -0.2345332 | 0.6878077 | 0.6587057   |
| Year | 2000-2004 | 0          | 0.3101819 | 0.0315447  | 0.5888192 | 0.0206992   |
| Year | 2014-2004 | 0          | 0.7968376 | 0.4066674  | 1.1870079 | 0.0000006   |
| Year | 1994-2016 | 0          | 0.1706678 | -0.3977044 | 0.7390401 | 0.9222368   |
| Year | 2000-2016 | 0          | 0.2542125 | -0.1793859 | 0.6878109 | 0.4904991   |
| Year | 2014-2016 | 0          | 0.7408682 | 0.2284215  | 1.2533149 | 0.0009027   |
| Year | 2000-1994 | 0          | 0.0835447 | -0.3792733 | 0.5463627 | 0.9875980   |
| Year | 2014-1994 | 0          | 0.5702004 | 0.0328042  | 1.1075965 | 0.0314693   |
| Year | 2014-2000 | 0          | 0.4866557 | 0.0945394  | 0.8787719 | 0.0067985   |

**Table S10.** Tukey multiple comparisons of means 95% family-wise confidence level, for *E. superba* and environmental parameters at 199 m.

| Term | Contrast  | Null.Value | Estimate  | Conf.Low   | Conf.High | Adj.P.Value |
|------|-----------|------------|-----------|------------|-----------|-------------|
| Year | 2016-2004 | 0          | 0.0501521 | -0.3836054 | 0.4839097 | 0.9977636   |
| Year | 1994-2004 | 0          | 0.2083551 | -0.2547885 | 0.6714986 | 0.7290175   |
| Year | 2000-2004 | 0          | 0.2639455 | -0.0183866 | 0.5462777 | 0.0792336   |
| Year | 2014-2004 | 0          | 0.7910203 | 0.3990004  | 1.1830402 | 0.0000009   |
| Year | 1994-2016 | 0          | 0.1582030 | -0.4119389 | 0.7283448 | 0.9406496   |
| Year | 2000-2016 | 0          | 0.2137934 | -0.2224075 | 0.6499943 | 0.6608872   |
| Year | 2014-2016 | 0          | 0.7408682 | 0.2268260  | 1.2549104 | 0.0009486   |
| Year | 2000-1994 | 0          | 0.0555905 | -0.4098422 | 0.5210232 | 0.9974616   |
| Year | 2014-1994 | 0          | 0.5826652 | 0.0435959  | 1.1217346 | 0.0269093   |
| Year | 2014-2000 | 0          | 0.5270748 | 0.1323530  | 0.9217965 | 0.0027830   |
